# Supplementary material for: Placental miR-340 mediates vulnerability to activity based anorexia in mice
Source: PubMed Central journal article supplement (PMC5913294; doi:10.1038/s41467-018-03836-2), 2018-04-23
Supplement: 41467_2018_3836_MOESM1_ESM.pdf [file 41467_2018_3836_MOESM1_ESM.pdf]

## Supplementary Fig. 1

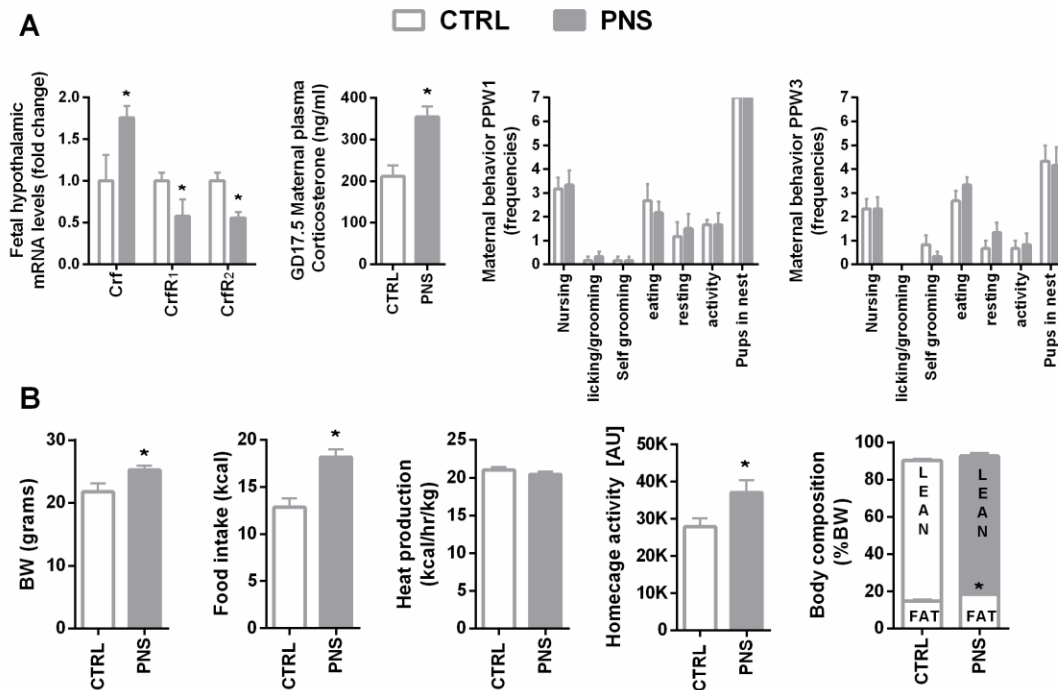

**Supplementary Fig. 1 Prenatal stress induced stress related responses in the mother and the fetuses.** (A) The CRF system is dysregulates in female fetuses (Two-way ANOVA  $F_{int(2,30)}=7.66$ ,  $p=0.002$ ). PNS increase plasma CORT in the mother ( $t_{(10)}=3.88$ ,  $p=0.003$ ). Maternal behavior was not affected was not affected by the manipulation. (B) PNS affected basal metabolism in females by increasing BW ( $t_{(10)}=2,32$ ,  $p=0.043$ ), food intake ( $t_{(10)}=4,32$ ,  $p=0.0015$ ), activity ( $t_{(10)}=2,25$ ,  $p=0.0478$ ) and body fat ( $t_{(10)}=2,45$ ,  $p=0.034$ ) but not heat production. Data presented in mean and SEM.

## Supplementary Fig. 2

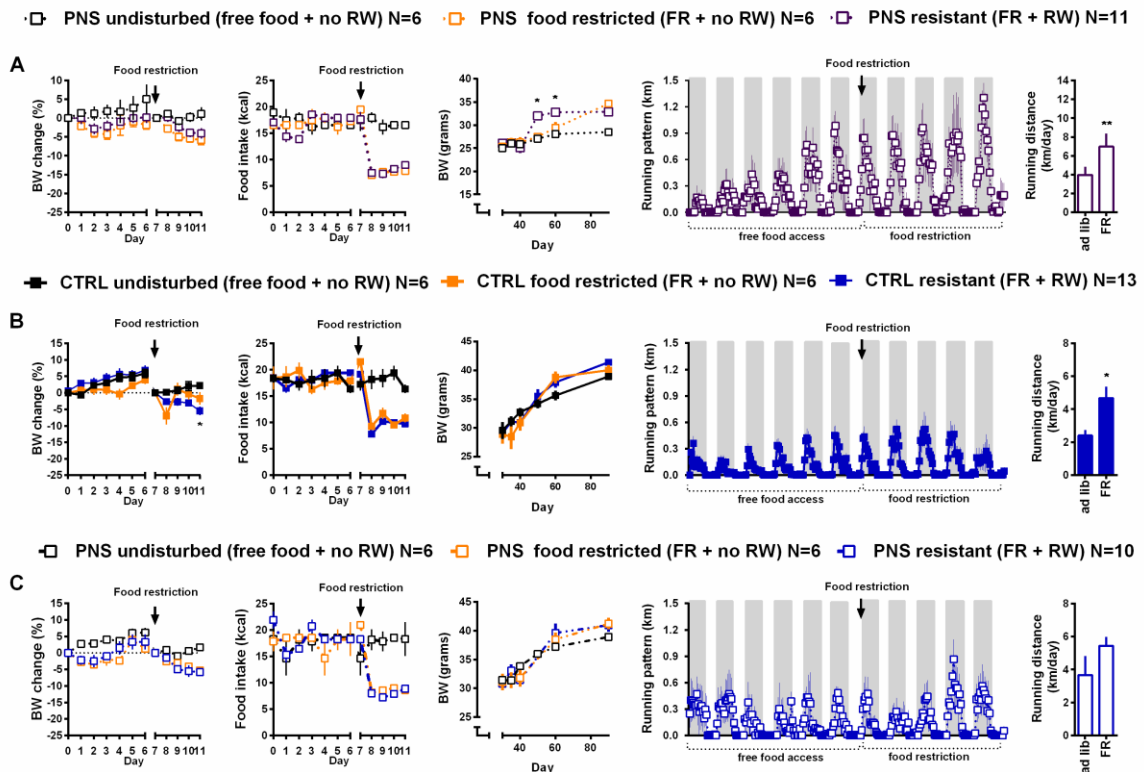

**Supplementary Fig. 2** Activity based anorexia (ABA) vulnerability was abolished in adolescent PNS females (**A**), in adolescent CTRL males (**B**) and in adolescent PNS males (**C**). Specifically, the ABA protocol didn't produce perceivable changes in BW or food intake in any of the groups, when compared to food restricted controls. Despite a transient increase during the recovery phase, long term BW was not affected by the ABA protocol. Running pattern was normal in and total running distance during FR was moderately increased. Data presented in mean and SEM. CTRL: control. RW: running wheel.

### Supplementary Fig. 3

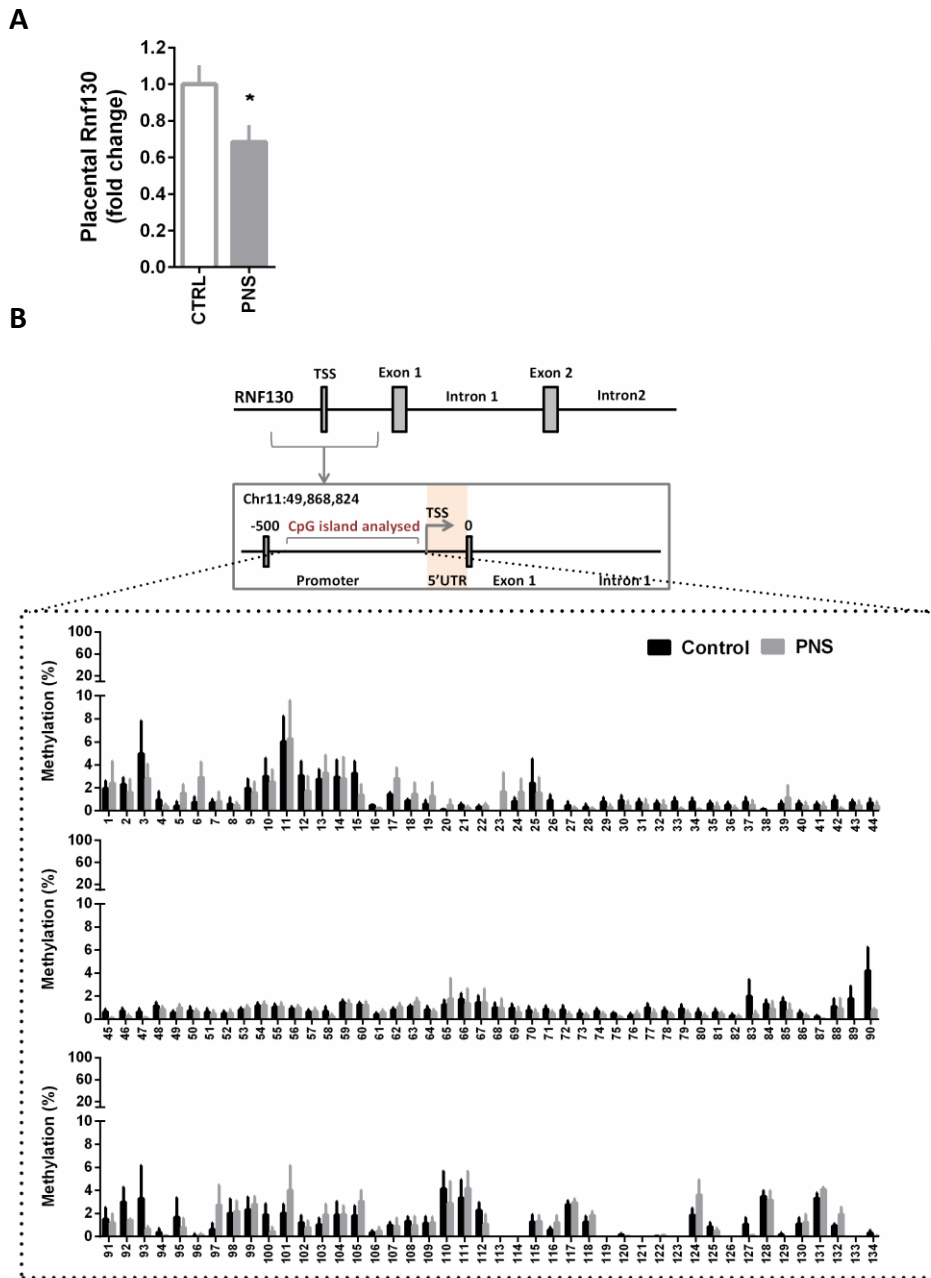

**Supplementary Fig. 3 (A)** Rfn130 gene expression was reduced by PNS ( $t_{(21)}=2.262$ ,  $p=0.034$ ,  $N=11,12$ ). **(B)** Rnf130 promoter DNA methylation analysis showed no differences between controls and PNS.

## Supplementary Fig. 4

 Conserved miR-340 binding site between species

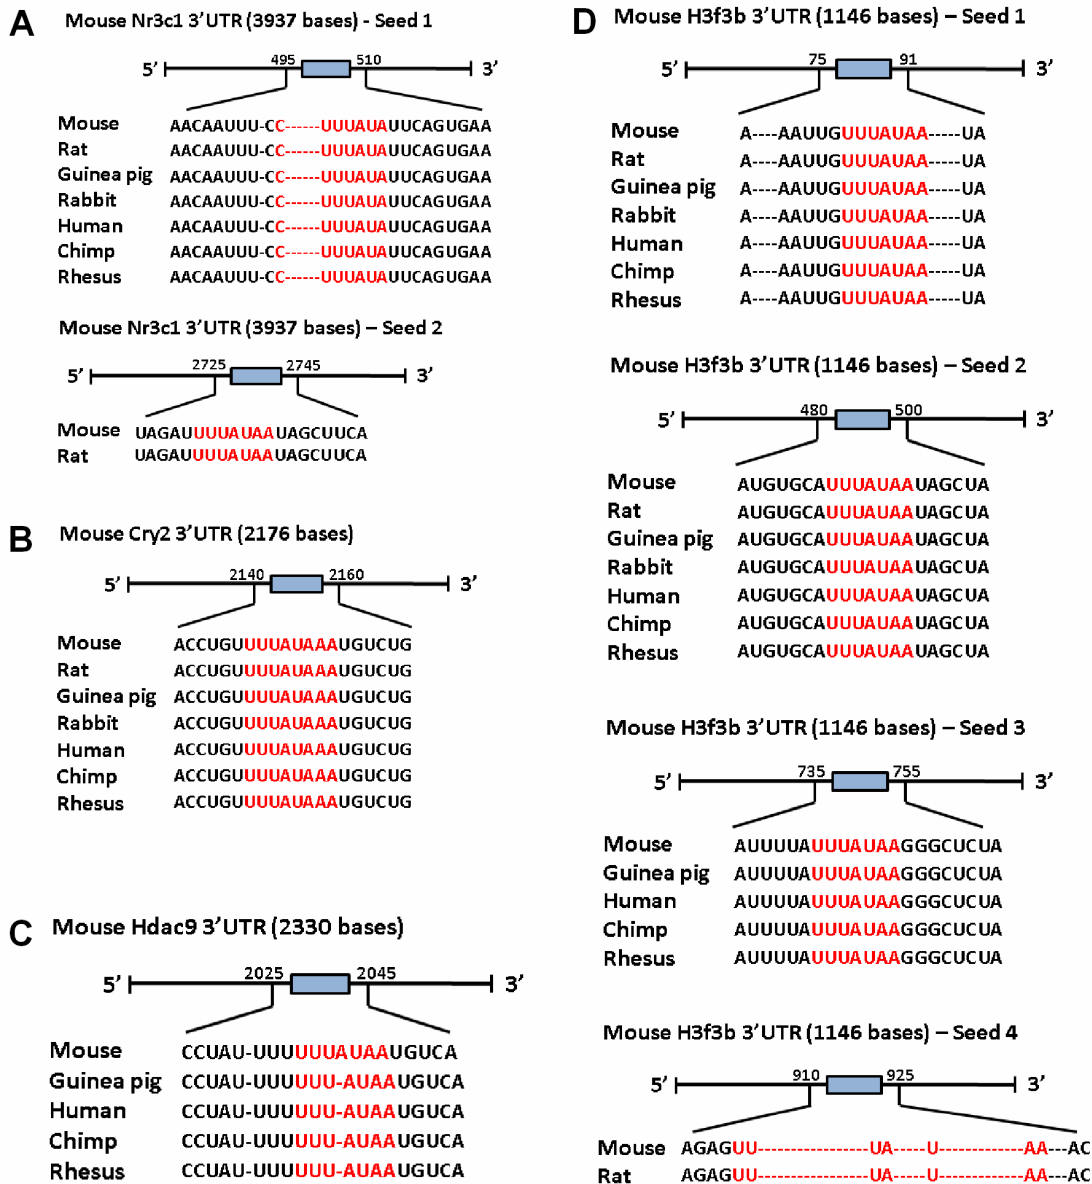

**Supplementary Fig. 4** (A) Mouse Nr3c1 (GR) 3'UTR with conserved (Seed 1) and not conserved (Seed 2) seeds for miR-340. (B) Mouse Cry2 3'UTR with conserved seed for miR-340. (C) Mouse Hdac9 3'UTR with conserved seed for miR-340. (D) Mouse H3f3b 3'UTR with conserved (Seeds 1-3) and not conserved (Seed 4) seeds for miR-340.

Supplementary Fig. 5

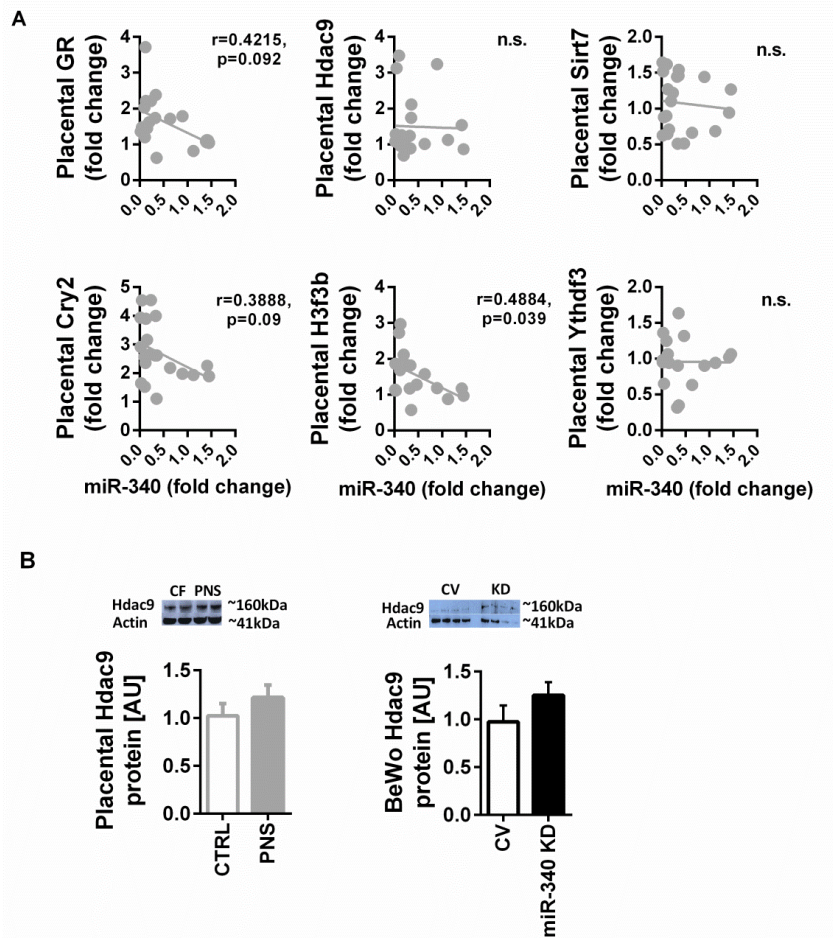

**Supplementary Fig. 5** Within the PNS group, miR-340 showed a tendency to an inverse correlation with the expression of *GR* and *Cry2*. This inverse correlation was significant for *H3f3b*. *Hdac9*, *Sirt7* and *Ythdf3* did not show an inverse correlation with the levels of miR-340. N=18. (B) Placental Hdac9 protein was not increased by PNS. MiR-340 KD in BeWo cells did not increase Hdac9 protein levels. N=4. Data are presented in mean and SEM.

**Supplementary Fig. 6**

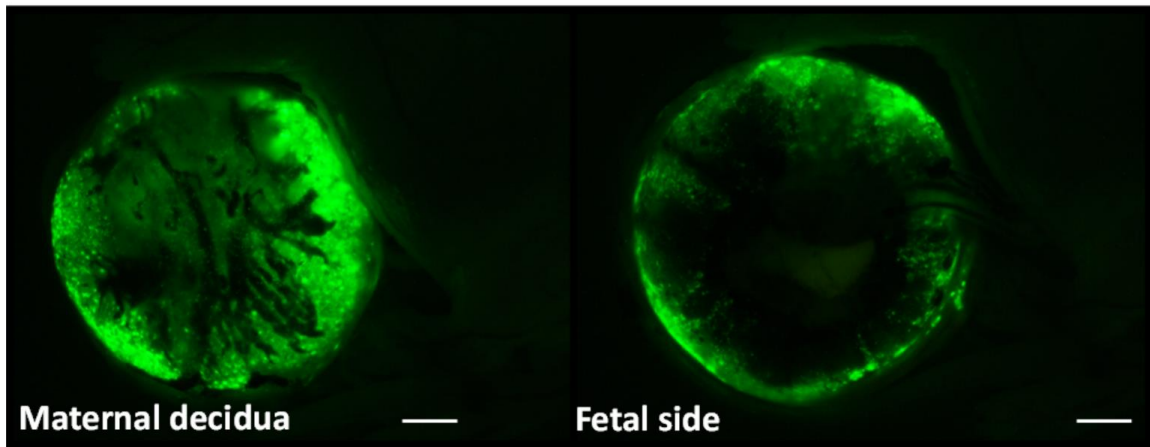

**Supplementary Fig. 6 Viral miR-340 OE is relatively more concentrated in the junctional area of the placenta.** In the left picture, it can be seen that the infection is weaker in the center of the top layer (maternal decidua). This is also the case for the fetal side (right picture), where GFP is not observed in the central area of the labyrinth. Scale Bar: 1mm.

## Supplementary Fig. 7

  CV Resistant 
   CV ABA 
   miR-340 OE Resistant 
   miR-340 OE ABA

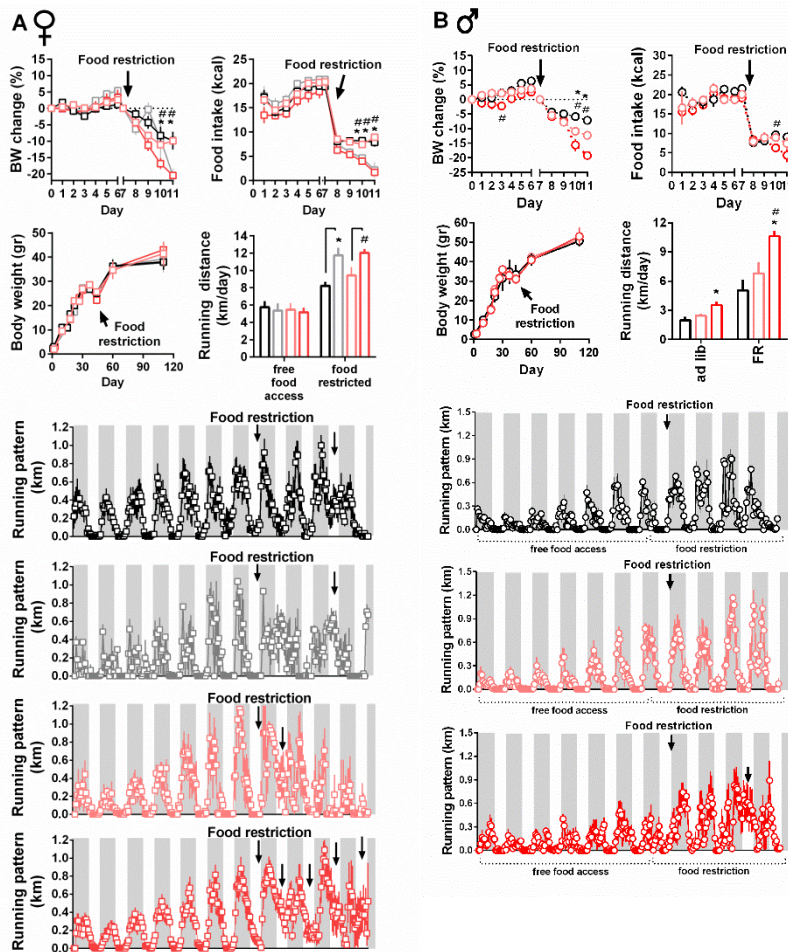

**Supplementary Fig. 7 (A)** Raw data parameters of the ABA protocol in female placental transgenes. The ABA protocol induced a dramatic decrease in BW ( $F_{\text{int}(33,286)}=2.628$ ,  $p<0.0001$ ) and food intake ( $F_{\text{int}(30,260)}=1.82$ ,  $p=0.0073$ ) in ABA prone compared to resistant females with both viruses (CV ABA  $N=4$ , CV Resistant  $N=11$ , miR-340 OE ABA  $N=11$  and miR-340 OE Resistant  $N=4$ ). Long term body weight was similar between the groups. Total running distance was significantly increased during FR in both ABA groups ( $F_{\text{int}(3,26)}=6.646$ ,  $p=0.0018$ ). Running pattern was normal in resistant females and disrupted in the ABA group, which displayed high activity in the light phase. \* $p<0.05$  for CV ABA vs. CV Resistant and #  $p<0.05$  for miR-340 OE ABA vs. miR-340 OE Resistant based on Tukey's multiple comparisons test. **(B)** Raw data parameters of the ABA protocol in male placental transgenes. The ABA protocol induced a dramatic

decrease in BW in miR-340 OE ABA prone males ( $F_{\text{int}(22,144)}=3.431$ ,  $p<0.0001$ ). No effect was observed in food intake. Long term body weight was similar between the groups. Total running distance was significantly increased during FR in the miR-340 OE ABA group ( $F_{\text{int}(2,12)}=5.579$ ,  $p=0.0194$ ). Running pattern was normal in resistant males, but was disrupted in the ABA group, which displayed high activity in the light phase. \* $p<0.05$  for miR-340 OE ABA vs. miR-340 OE Resistant and # $p<0.05$  for miR-340 OE ABA vs. CV Resistant based on Tukey's multiple comparisons test. CV Resistant N=7, miR-340 OE ABA N=4 and miR-340 OE Resistant N=4. Data presented in mean and SEM.

**Supplementary Fig. 8**

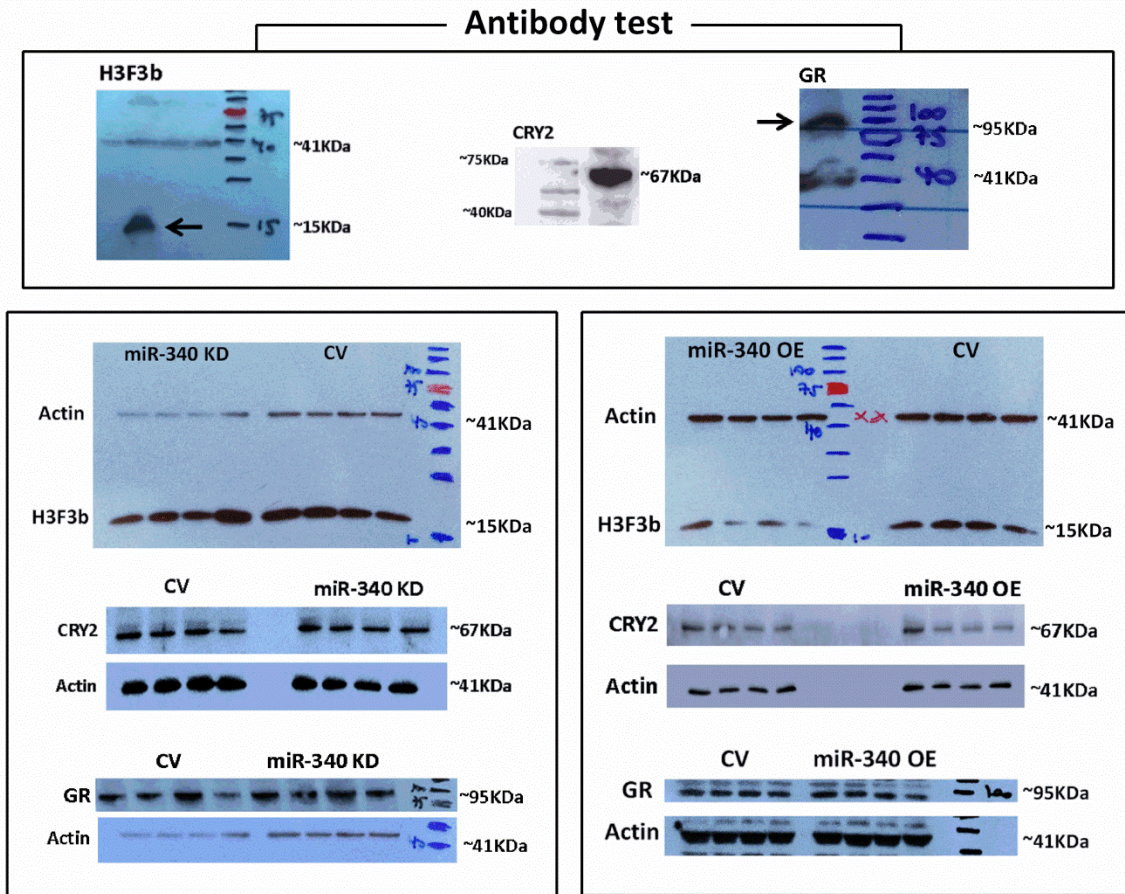

**Supplementary Fig. 8 Western blot antibody tests and membranes.**



**Supplementary Table 1. Taqman placental gene expression predictions for miR-340 and array.**

| Gene          | miRanda  | miRDB    | miRWalk  | Targetscan | Conserved seeds (total) | fold change | p value      |
|---------------|----------|----------|----------|------------|-------------------------|-------------|--------------|
| Igf2bp3       | 1        | 1        | 1        | 1          | 1 (1)                   | -1.02       | 0.764        |
| <b>Sirt7</b>  | <b>1</b> | <b>1</b> | <b>1</b> | <b>1</b>   | <b>1 (1)</b>            | <b>1.23</b> | <b>0.009</b> |
| Pgr           | 1        | 1        | 1        | 1          | 1 (1)                   | -1.04       | 0.946        |
| <b>Ythdf3</b> | <b>1</b> | <b>1</b> | <b>1</b> | <b>1</b>   | <b>3 (4)</b>            | <b>1.21</b> | <b>0.004</b> |
| Ogt           | 1        | 1        | 1        | 1          | 2 (2)                   | 1.10        | 0.112        |
| Il10          | 1        | 1        | 1        | 1          | 1 (2)                   | -1.29       | 0.969        |
| Robo1         | 1        | 1        | 1        | 1          | 1 (1)                   | -1.02       | 0.882        |
| Rhoa          | 1        | 1        | 1        | 1          | 1 (1)                   | -1.17       | 0.313        |
| Hctr2         | 1        | 1        | 1        | 1          | 1 (4)                   | -1.35       | 0.040        |
| Mat2a         | 1        | 1        | 1        | 1          | 1 (1)                   | 1.27        | 0.114        |
| <b>Nr3c1</b>  | <b>1</b> | <b>1</b> | <b>1</b> | <b>1</b>   | <b>1 (2)</b>            | <b>1.36</b> | <b>0.046</b> |
| Igf1          | 1        | 0        | 1        | 1          | 1 (1)                   | -1.06       | 0.572        |
| Igf1r         | 1        | 0        | 1        | 1          | 4 (4)                   | -1.13       | 0.168        |
| <b>Hdac9</b>  | <b>1</b> | <b>0</b> | <b>1</b> | <b>1</b>   | <b>1 (1)</b>            | <b>1.54</b> | <b>0.083</b> |
| Cnrip1        | 1        | 0        | 1        | 1          | 1 (1)                   | 1.14        | 0.365        |
| Pparg         | 1        | 0        | 1        | 1          | 1 (1)                   | -1.01       | 0.916        |
| Hif1a         | 1        | 0        | 1        | 1          | 1 (3)                   | 1.29        | 0.145        |
| <b>Cry2</b>   | <b>1</b> | <b>0</b> | <b>1</b> | <b>1</b>   | <b>1 (1)</b>            | <b>1.94</b> | <b>0.015</b> |
| Htr2c         | 1        | 0        | 1        | 1          | 1 (2)                   | 1.13        | 0.554        |
| Slc2a1        | 1        | 0        | 1        | 1          | 1 (1)                   | -1.16       | 0.014        |
| Slc38a4       | 1        | 0        | 1        | 1          | 1 (1)                   | -1.01       | 0.787        |
| Slc38a3       | 1        | 0        | 1        | 1          | 1 (1)                   | -1.07       | 0.506        |
| Pax3          | 1        | 0        | 1        | 1          | 1 (1)                   | -1.27       | 0.014        |
| Mll1          | 1        | 0        | 1        | 1          | 1 (2)                   | 1.04        | 0.548        |
| Avpr1a        | 0        | 1        | 1        | 1          | 1 (2)                   | -1.06       | 0.885        |
| Irs1          | 1        | 0        | 1        | 0          | 1 (2)                   | -1.15       | 0.405        |
| <b>H3f3b</b>  | <b>1</b> | <b>0</b> | <b>1</b> | <b>0</b>   | <b>3 (4)</b>            | <b>1.32</b> | <b>0.002</b> |
| Dnmt3a        | 1        | 0        | 1        | 0          | 1 (2)                   | -1.02       | 0.814        |
| Alkbh5        | 0        | 1        | 1        | 0          | 1 (3)                   | 1.09        | 0.300        |

**Supplementary Table 2. Sample classification and clinical characteristics of patients**

| Term placentae N=35            | Mean $\pm$ SD      |
|--------------------------------|--------------------|
| Maternal age, y                | 32.7 $\pm$ 4.9     |
| Gravidity                      | 2.2 $\pm$ 0.9      |
| Parity                         | 1.9 $\pm$ 0.8      |
| Gestational age, weeks         | 39.3 $\pm$ 0.5     |
| Placental weight, g            | 595.1 $\pm$ 132.1  |
| Birth weight, g                | 3321.3 $\pm$ 448.6 |
| Caucasian                      | 94.3 % (33/35)     |
| Sex of the infant, female/male | 16/19              |

Term control: Delivery by elective caesarean section  $\geq$  37 gestational weeks without clinical or histopathologic abnormalities. The indication for caesarean section was either patient's wish or history of  $\geq$  two caesarean sections. Data presented in mean  $\pm$  SD.

**Supplementary Table 3. Correlation between nutrient transporters and miR-340 expression in female mouse and human placentas (N=12 for mice and N=35 for human samples).**

| Gene name | Predominant substrate       | Mouse placenta | Human placenta |
|-----------|-----------------------------|----------------|----------------|
| Slc19a2   | Thiamine (B1)               | ↑ p<0.05       | n.s.           |
| Slc46a1   | Folate (B6)                 | n.s.           | ↓ p<0.05       |
| Slc5a6    | Biotin                      | ↑ p<0.05       | n.s.           |
| Lmbrd1    | Cobalamin (B12)             | ↑ p<0.05       | n.s.           |
| Slc22a15  | Pyridoxine (B6)             | ↓ p<0.05       | n.s.           |
| Slc23a3   | L-ascorbic acid (Vitamin C) | n.s.           | n.s.           |
| Slc30a4   | Zinc                        | ↑ p<0.05       | n.s.           |
| Slc26a2   | Sulfate ions                | ↑ p<0.05       | ↓ p<0.05       |
| Slc11a2   | Zinc, Iron                  | ↓ p<0.05       | n.s.           |
| Abca1     | Cholesterol, phospholipids  | n.s.           | ↓ p<0.05       |
| Abcg1     | Cholesterol, phospholipids  | ↑ p<0.05       | ↓ p<0.05       |
| Slc2a1    | Glucose                     | n.s.           | ↓ p<0.05       |

↑ positive correlation, ↓ negative correlation.

**Supplementary Table 4. Mouse RT-PCR primers**

|                 | 5'                       | 3'                        |
|-----------------|--------------------------|---------------------------|
| miR-340-5p      | TTATAAAGCAATGAGACTGATT   | miScript universal primer |
| U6              | GATGACACGCAAATTCGTGAA    | miScript universal primer |
| 11Hsd $\beta$ 2 | AACCTCTGGCAGAAACGCAAG    | GGCATCTACAACCTGGGCTAAGG   |
| Rnf130          | CCCATCCACGGAGTTGCT       | GAACCGTGTTTGAGGATCACAG    |
| Nr3c1/GR        | TGCTGTTTATCTCCACTGAATTAC | TCCTTAGGAACTGAGGAGAGAAGC  |
| Cry2            | ATGTGTTCCCAAGGCTGTTT     | GGTTTCTGCCATTTCAGTTC      |
| Sirt7           | GTTTGCATGAGCAAAAGCTG     | ATGCAGGAGGTGCAGACTTC      |
| Hdac9           | GCAGCAGATCCACATGAACA     | AGAGGCTGCTCTGTCTTCCA      |
| H3f3b           | GGTGCCCTTCAGGAGGCTA      | TGATGGTGACTCTCTTGGCG      |
| Ythdf3          | TGCACATTATGAAAAGCGTCA    | AGATGCGCTGATGAAAACCA      |
| Tbp             | CTCAGTTACAGGTGGCAGCA     | ACCAACAATCACCAACAGCA      |
| AgRP            | AAGCTTTGGCGGAGGTGCTAGAT  | AAGCAGGACTCGTGAGCCTTACA   |
| Htr1a           | GTGCACCATCAGCAAGGACC     | GCGCCGAAAGTGGAGTAGAT      |
| Bdnf            | AGGCACTGGAACCTCGCAA      | AATCGCCAGCCAATTCTC        |
| Mc4R            | CAAGAACCTGCACTCACCCA     | GACCCATTGAAACGCTCAC       |
| Hcrt            | ACCACTGCACTGAAGAGATCA    | CCCAGGGAACCTTTGTAGAAGGA   |
| Avp             | TCAACTACTGCTCTCCGCTT     | CCTTTGCCGCCCGG            |
| Crf             | GCAGTTAGCTCAGCAAGCTCAC   | CAAATGATATCGGAGCTGCG      |
| CrfR1           | TGCCAGGAGATTCTCAACGAA    | AAAGCCGAGATGAGGTTCCAG     |
| CrfR2           | TACCGAATCGCCCTCATTGT     | CCACGCGATGTTTCTCAGAAT     |
| Hprt            | GCAGTACAGCCCCAAAATGG     | GGTCCTTTTACCAGCAAGCT      |

**Supplementary Table 5. Human RT-PCR primers**

|          | 5'                    | 3'                       |
|----------|-----------------------|--------------------------|
| ABCA1    | CACATTTTTGCCTGGGACG   | AGCGATTCTCCCCAACCTT      |
| ABCG1    | AACATGGAGGCCACTGAGAC  | GGCCACCAACTCACCCTAT      |
| LMBRD1   | CCTCTTACTACTGGCTATT   | TTATGGTGGAGACAACCTT      |
| SLC2A1   | GAACTCTTCAGCCAGGGTCC  | ACCACACAGTTGCTCCACAT     |
| SLC5A6   | GTCCTGTACTTTGTGATG    | AGGATATAGTGCTGAGAG       |
| SLC7A5   | CAGGGCATCTTCTCCACGAC  | GAAAGGGCAACCATGAAGAGG    |
| SLC7A11  | TGCTGGGCTGATTTATCTTCG | TGGGTTCCGAGGAGGTGATCTA   |
| SLC11A2  | TTGCGGAGCTGGTAAGAATCA | AAGACTGGCAGACTCCCCAT     |
| SLC19A2  | TCACGATAGCAACTTTTC    | GGCATCTACCACAATTAG       |
| SLC22A15 | CTGGCTTGTCTTATTGTAA   | CAACATTCCTGATGACTG       |
| SLC23A3  | CTGGCTTGTCTTATTGTAA   | AGACAGTTCCGAAAGGAG       |
| SLC26A2  | GATTGGTGAGACAGTTGAC   | CCCATCGCTACCTGATAA       |
| SLC30A4  | ACTAGAAGGTGTGCCAAGCC  | AGCTGTATGTGAACTATGGCAGT  |
| SLC38A1  | CAGCGCCGGTGCATGTCGA   | TGGAAGCTTGACACCCCTGTTAGC |
| SLC46A1  | ACTCCAAACTAATCGGCTAT  | AACCCATATCCTGTGAACA      |
| SLC16A3  | GCCCCCTTCGGGAGGCAAAC  | GGCCCCCGCCAGGATGAAC      |
| IGF2     | GTGCTACCCCCGCCAAGT    | TGGACTGCTTCCAGGTGTCA     |
| IGF2BP1  | CCTGCTGGCTCAGTATGGT   | GACATTCACCACTGCCGTCTC    |
| UBQ      | TCGCAGCCGGGATTTG      | GCATTGTCAAGTGACGATCACA   |
| YWHAZ    | CCGTTACTTGGCTGAGGTTG  | AGTTAAGGGCCAGACCCAGT     |
