# Supplementary material for: Placental miR-340 mediates vulnerability to activity based anorexia in mice
Source: PubMed Central journal article supplement (PMC5913294; doi:10.1038/s41467-018-03836-2), 2018-04-23
Supplement: 41467_2018_3836_MOESM3_ESM.pdf [file 41467_2018_3836_MOESM3_ESM.pdf]

## **Description of Additional Supplementary Files**

File Name: Supplementary Data 1

Description: **Placental miR array comparing CTRL and PNS females.**
